# Supplementary material
Source: Research Square preprint supplement (doi:10.21203/rs.3.rs-10250021/v1)
Supplement: Supplementary file 1 [file 6a88bdc7ebd933fb51bbe337.docx]

**Supplementary Material**

Table A1. Village-level SHC testing coverage by district, Maharashtra, 2023-24. Coverage computed as villages tested divided by total villages from Census of India 2011. Districts marked with an asterisk recorded coverage below 10% of total villages in 2023-24 and carry additional measurement uncertainty.

| **District** | **Villages Tested 2023-24** | **Villages Tested 2024-25** | **Total Villages** | **Coverage 2023-24 (%)** |
| --- | --- | --- | --- | --- |
| Ahilyanagar * | 132 | 558 | 1,392 | 9.5 |
| Akola | 106 | 318 | 893 | 11.9 |
| Amravati | 192 | 407 | 1,356 | 14.2 |
| Beed * | 103 | 328 | 1,374 | 7.5 |
| Bhandara | 172 | 325 | 758 | 22.7 |
| Buldhana | 212 | 641 | 1,230 | 17.2 |
| Chandrapur | 269 | 495 | 1,546 | 17.4 |
| Chhatrapati Sambhajinagar * | 123 | 409 | 1,331 | 9.2 |
| Dharashiv | 93 | 258 | 744 | 12.5 |
| Dhule | 180 | 398 | 574 | 31.4 |
| Gadchiroli | 261 | 462 | 1,634 | 16.0 |
| Gondia * | 36 | 280 | 860 | 4.2 |
| Hingoli * | 55 | 370 | 686 | 8.0 |
| Jalgaon * | 138 | 510 | 1,511 | 9.1 |
| Jalna * | 94 | 376 | 968 | 9.7 |
| Kolhapur | 427 | 507 | 1,211 | 35.3 |
| Latur | 142 | 356 | 952 | 14.9 |
| Nagpur | 369 | 495 | 1,829 | 20.2 |
| Nanded * | 114 | 529 | 1,553 | 7.3 |
| Nandurbar | 195 | 236 | 764 | 25.5 |
| Nashik | 405 | 738 | 1,962 | 20.6 |
| Palghar * | 56 | 52 | 1,002 | 5.6 |
| Parbhani | 116 | 389 | 843 | 13.8 |
| Pune * | 184 | 647 | 1,866 | 9.9 |
| Raigad | 320 | 530 | 1,517 | 21.1 |
| Ratnagiri * | 118 | 143 | 1,608 | 7.3 |
| Sangli | 184 | 346 | 740 | 24.9 |
| Satara | 374 | 496 | 1,360 | 27.5 |
| Sindhudurg | 118 | 130 | 723 | 16.3 |
| Solapur | 140 | 417 | 1,138 | 12.3 |
| Thane * | 38 | 304 | 1,306 | 2.9 |
| Wardha | 109 | 360 | 897 | 12.2 |
| Washim | 73 | 390 | 684 | 10.7 |
| Yavatmal * | 95 | 89 | 1,601 | 5.9 |

*Note: * = coverage below 10% of total villages in 2023-24. Source: SHC portal district records; Census of India 2011.*
